# Supplementary material
Source: publisher site journal article supplement (https://www.dovepress.com/article/324765)
Supplement: Supplementary file 1 [file get_supplementary_file.php]

# Supplementary Figure 1

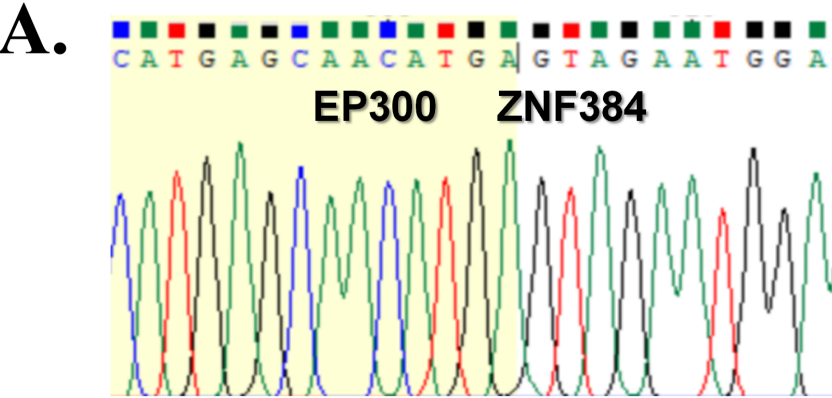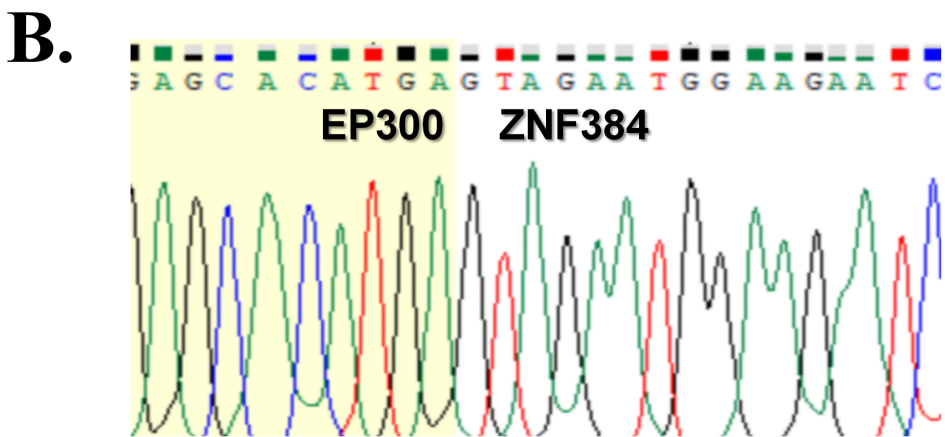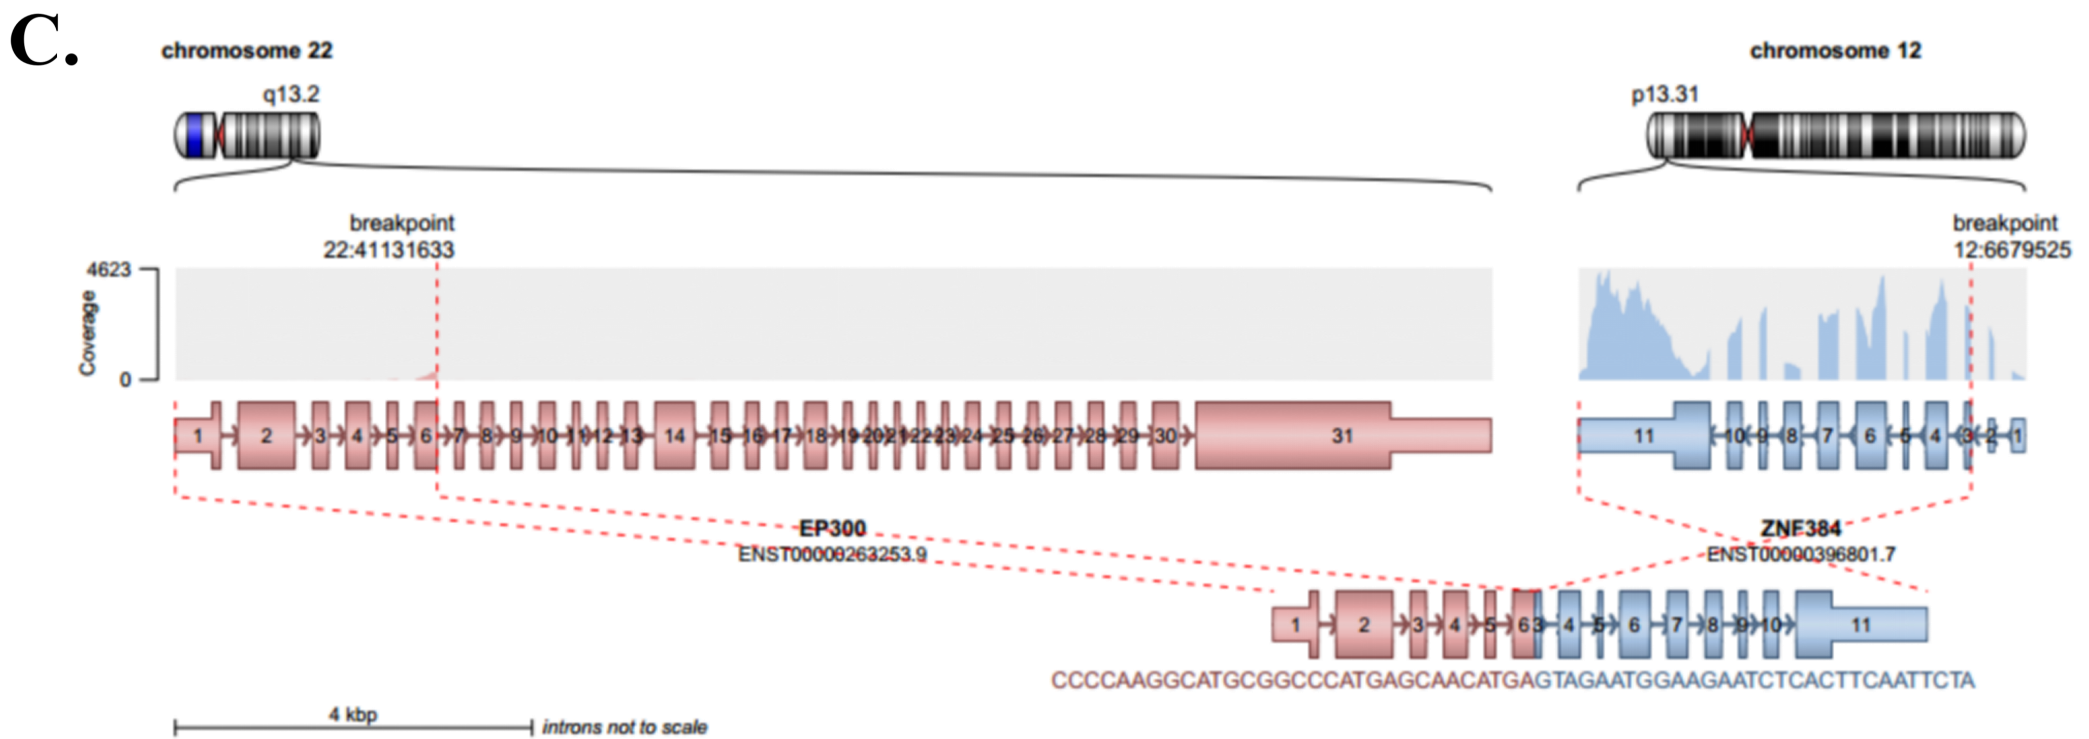

**Supplementary Table 1. A panel of 43 fusion genes detected by multiplex reverse transcription-polymerase chain reaction**

|                     |                       |              |              |
|---------------------|-----------------------|--------------|--------------|
| BCR-ABL1(P210)      | PML-RAR $\alpha$ (L)  | KMT2A-AFF1   | NUP98-HOXA9  |
| BCR-ABL1(P190)      | PML-RAR $\alpha$ (S)  | KMT2A-AFDN   | NUP98-HOXA11 |
| BCR-ABL1(P230)      | PML-RAR $\alpha$ (V)  | KMT2A-MLLT3  | NUP98-HOXA13 |
| RUNX1-RUNX1T1       | PLZF-RAR $\alpha$     | KMT2A-MLLT10 | NUP98-HOXC11 |
| RUNX1-MTG16         | NPM-RAR $\alpha$      | KMT2A-MLLT6  | NUP98-HOXD13 |
| RUNX1-MDS1/EVI1     | NUMA1-RAR $\alpha$    | KMT2A-ELL    | NUP98-PMX1   |
| CBF $\beta$ -MYH11  | FIP1L1-RAR $\alpha$   | KMT2A-MLLT1  | DEK-NUP214   |
| ETV6-ABL1           | STAT5B-RAR $\alpha$   | KMT2A-EPS15  | SET-NUP214   |
| ETV6-AML1           | PRKAR1A-RAR $\alpha$  | KMT2A-MLLT11 | E2A-PBX1     |
| ETV6-JAK2           | NPM-ALK               | KMT2A-FOXO4  | E2A-HLF      |
| ETV6-PDGFR $\beta$  | NPM-MLF1              | KMT2A-SEPT6  | STIL-TAL1    |
| ETV6-PDGFR $\alpha$ | FIP1L1-PDGFR $\alpha$ | FUS-ERG      |              |

**Supplementary Table 2. A pannel of 222 genes detected by next generation sequencing**

|         |        |           |          |         |          |
|---------|--------|-----------|----------|---------|----------|
| ABL1    | CD274  | EPHA7     | JAK3     | PIM1    | SRSF2    |
| ANKRD26 | CD28   | EPOR      | KANSL1   | PLCG1   | STAG2    |
| APC     | CD58   | ERBB3     | KDM6A    | PLCG2   | STAT1    |
| ARAF    | CD79A  | ETNK1     | KIT      | POT1    | STAT2    |
| ARC     | CD79B  | ETV6      | KLF2     | PPM1D   | STAT3    |
| ARID1A  | CDKN1A | EZH2      | KMT2A    | PRDM1   | STAT4    |
| ARID1B  | CDKN2A | FAS       | KMT2C    | PRKCB   | STAT5A   |
| ARID2   | CDKN2B | FAT1      | KMT2D    | PTEN    | STAT5B   |
| ARID5B  | CDKN2C | FBXW7     | KRAS     | PTPN1   | STAT6    |
| ASXL1   | CEBPA  | FGFR1     | MAP2K1   | PTPN11  | SUZ12    |
| ASXL2   | CEBPE  | FGFR3     | MAPK1    | PTPRD   | SYK      |
| ASXL3   | CHD8   | FLT3      | MECOM    | PTPRK   | TBL1XR1  |
| ATG5    | CIITA  | FOXO1     | MED12    | RAD21   | TCF3     |
| ATG2B   | CRBN   | FOXO3     | MEF2B    | RAF1    | FAM46C   |
| ATM     | CREBBP | FYN       | MET      | RB1     | TET1     |
| ATRX    | CRLF2  | GATA1     | MFHAS1   | RELN    | TET2     |
| B2M     | CSF1R  | GATA2     | MGA      | RET     | TNFAIP3  |
| BCL2    | CSF3R  | GATA3     | MPL      | RHOA    | TNFRSF14 |
| BCL6    | CSMD1  | GNA13     | MUM1     | RPS15   | TNFRSF1B |
| BCOR    | CTCF   | GNAI2     | MYC      | RRAGC   | TP53     |
| BCORL1  | CTLA4  | HACE1     | MYD88    | RUNX1   | TP63     |
| BIRC3   | CTNNB1 | HNRNPA2B1 | NF1      | SAMHD1  | TP73     |
| BLNK    | CUL4B  | HRAS      | NFKB1    | SETBP1  | TRAF3    |
| BRAF    | CXCR4  | ID3       | NFKB2    | SETD2   | TYK2     |
| BRCA1   | CYLD   | IDH1      | NFKBIE   | SF3B1   | U2AF1    |
| BRCA2   | DDX3X  | IDH2      | NOTCH1   | SGK1    | UNC13D   |
| BRCC3   | DDX41  | IGLL5     | NOTCH2   | SH2B3   | VAV1     |
| BTG1    | DHX15  | IKZF1     | NPM1     | SH2D1A  | VHL      |
| BTK     | DIS3   | IKZF2     | NRAS     | SMARCA4 | VPREB1   |
| CALR    | DNM2   | IKZF3     | NT5C2    | SMARCB1 | WT1      |
| CARD11  | DNMT3A | IL7R      | PAX5     | SMC1A   | XPO1     |
| CBL     | ECT2L  | INO80     | PDCD1LG2 | SMC2    | ZAP70    |
| CCND1   | EED    | INPP5D    | PDGFRA   | SMC3    | ZBTB7A   |
| CCND2   | EGFR   | IRF4      | PDGFRB   | SOCS1   | ZEB2     |
| CCND3   | EGR1   | ITPKB     | PHF6     | SOS1    | ZMYM3    |
| CCR4    | EGR2   | JAK1      | PIGA     | SPEN    | ZNF292   |
| CCR7    | EP300  | JAK2      | PIK3CA   | SRP72   | ZRSR2    |

**Supplementary Table 3. Relapsed and refractory patients with EP300-ZNF384**

| No. | Age | relapse/refractory | Blasts | Karyotype                        | Chemotherapy | CAR-T | allo-HSCT | CR  | Current Status | Reference                |
|-----|-----|--------------------|--------|----------------------------------|--------------|-------|-----------|-----|----------------|--------------------------|
| 1   | 28  | relapse            | 76%    | 46,XX[10]<br>45,X,-              | VDCLP        | No    | Yes       | Yes | Alive          | Jing et al. <sup>5</sup> |
| 2   | 19  | refractory         | 86%    | X[9]/46,XX[26]/<br>Subdiploid[7] | MAVP         | No    | No        | No  | Died           | Jing et al. <sup>5</sup> |
| 3   | 20  | refractory         | 96%    | 46,XY[10]                        | VDCLP        | Yes   | Yes       | No  | Died           | Jing et al. <sup>5</sup> |
| 4   | 32  | refractory         | 97%    | 46,XY[10]                        | VACLp        | Yes   | Yes       | No  | Died           | Jing et al. <sup>5</sup> |
